# Supplementary material for: CAR-engineered lymphocyte persistence is governed by a FAS ligand/FAS auto-regulatory circuit
Source: PubMed Central journal article supplement — bioRxiv. 2024 Mar 1:2024.02.26.582108. Preprint. [Version 1] doi: 10.1101/2024.02.26.582108 (PMC10925151; doi:10.1101/2024.02.26.582108), 2024-03-01
Supplement: NIHPP2024.02.26.582108v1-supplement-1.pdf [file NIHPP2024.02.26.582108v1-supplement-1.pdf]

**Supplementary Data Fig. 1: Gating strategy for the immunophenotyping by FACS analysis for CAR-T and CAR-NK cells.**

**Fig. 2c and 2h**

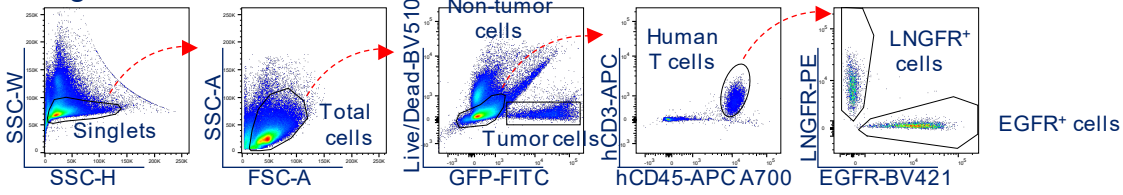

**Fig. 2f**

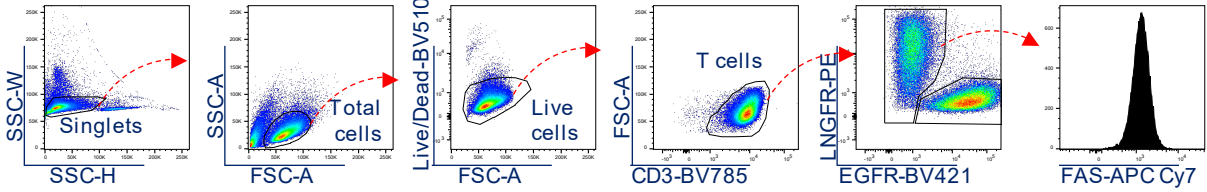

**Fig. 5a**

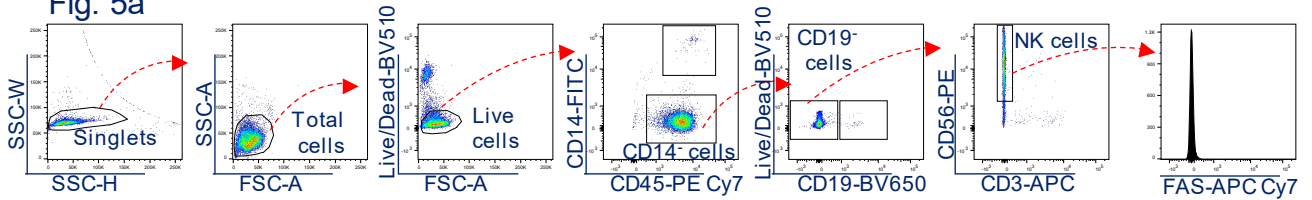

**Fig. 5c and Extended Data Fig. 3b**

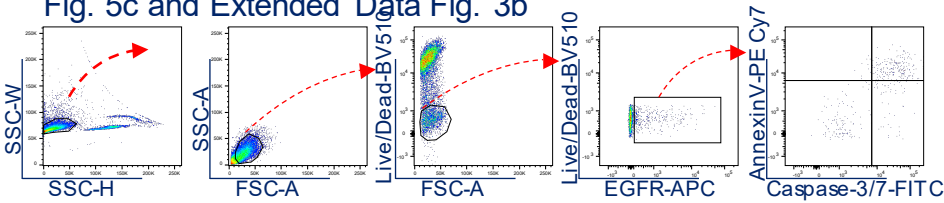

**Fig. 5e**

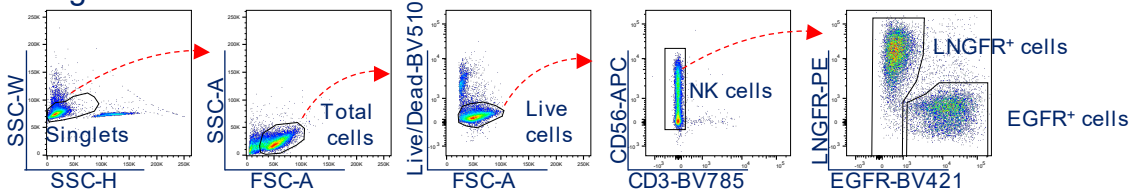

**Extended Data Fig. 3c**

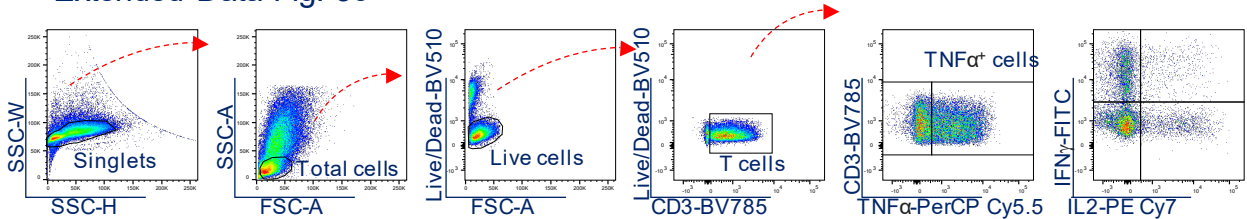

**Supplementary Table 1: sgRNA sequences for CRISPR/Cas9 gene editing.**

a.

| Gene name      | Protein name   | DNA sequence (5'-3') |
|----------------|----------------|----------------------|
| <i>AAVS1</i>   | Not applicable | GCCAGTAGCCAGCCCCGTCC |
| <i>FAS</i>     | FAS            | GTGACTGACATCAACTCCAA |
| <i>FASLG</i>   | FAS ligand     | TGGGGATATGGGTAATTGAA |
| <i>TNFSF10</i> | TRAIL          | CTCCTGCAGTCTCTCTGTGT |

b.

| Gene name      | Protein name   | Primer sequence (5'-3')      |
|----------------|----------------|------------------------------|
| <i>AAVS1</i>   | Not applicable | F: CCAAGGACTCAAACCCAGAA      |
|                |                | R: TGCTGCAGCTTCCTTACACT      |
| <i>FAS</i>     | FAS            | F: TCTATCATTTCATGGTGCTGTTTC  |
|                |                | R: AGGGGAACCAAAAACGTAAAA     |
| <i>FASLG</i>   | FAS ligand     | F: GAGAAAGACAGAGGTGTTTC      |
|                |                | R: AATCCTACCAAGGCAACC        |
| <i>TNFSF10</i> | TRAIL          | F: ACAGAACCCAGAAAAACAACATCAT |
|                |                | R: GCTGTTGCTACTGCTGTGGA      |
